# Supplementary material for: A 3D free-standing Co doped Ni2P nanowire oxygen electrode for stable and long-life lithium–oxygen batteries
Source: Royal Society of Chemistry journal article supplement (doi:10.1039/c9nr10793b), 2020-01-01
Supplement: c9nr10793b1.pdf [file c9nr10793b1.pdf]

## Supporting Information

### **3D Free-Standing Co doped Ni<sub>2</sub>P Nanowires Oxygen Electrode for Stable and Long-Life Lithium-Oxygen Battery**

*Zhiqian Hou, Chaozhu Shu\*, Peng Hei, Tingshuai Yang, Ruixin Zheng,*

*Zhiqun Ran, Jianping Long\**

College of Materials and Chemistry & Chemical Engineering, Chengdu University of Technology, 1# Dongsanlu, Erxianqiao, Chengdu 610059, Sichuan, P. R. China, E-mail: czshu@imr.ac.cn (C. Shu); longjianping@cdut.cn (J. Long).

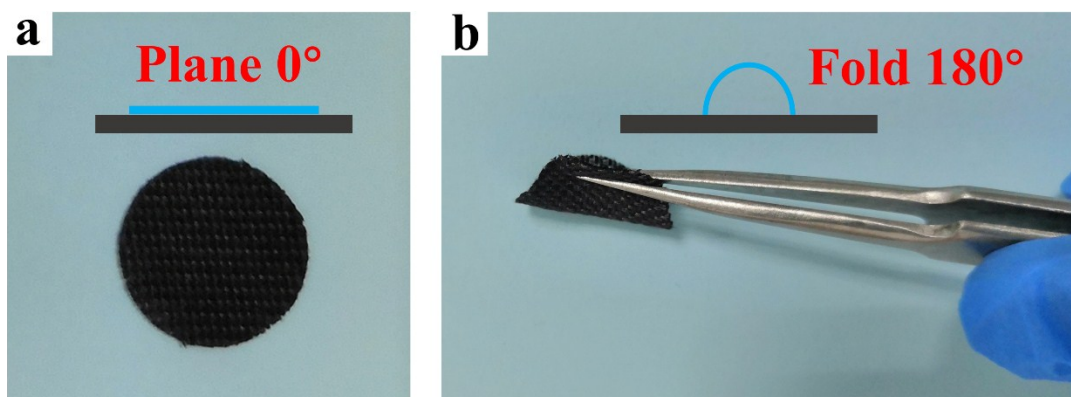

**Figure S1.** Digital photos of the Co-Ni<sub>2</sub>P@N-CC cathode without bend (a) and (b) twisting the electrode to 180°.

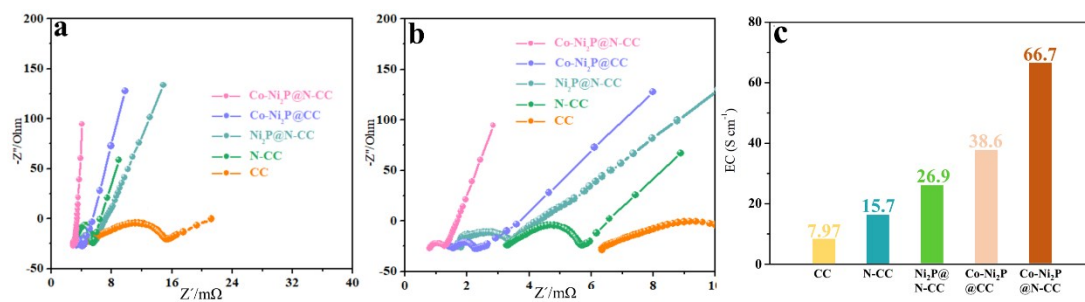

**Figure S2.** (a) Electrochemical impedance spectroscopy (EIS) of the Li-O<sub>2</sub> cells based on five electrodes; (b) is the magnified view of (a); (c) Electronic conductivity of five electrodes (CC, N-CC, Ni<sub>2</sub>P@N-CC, Co-Ni<sub>2</sub>P@CC, and Co-Ni<sub>2</sub>P@N-CC).

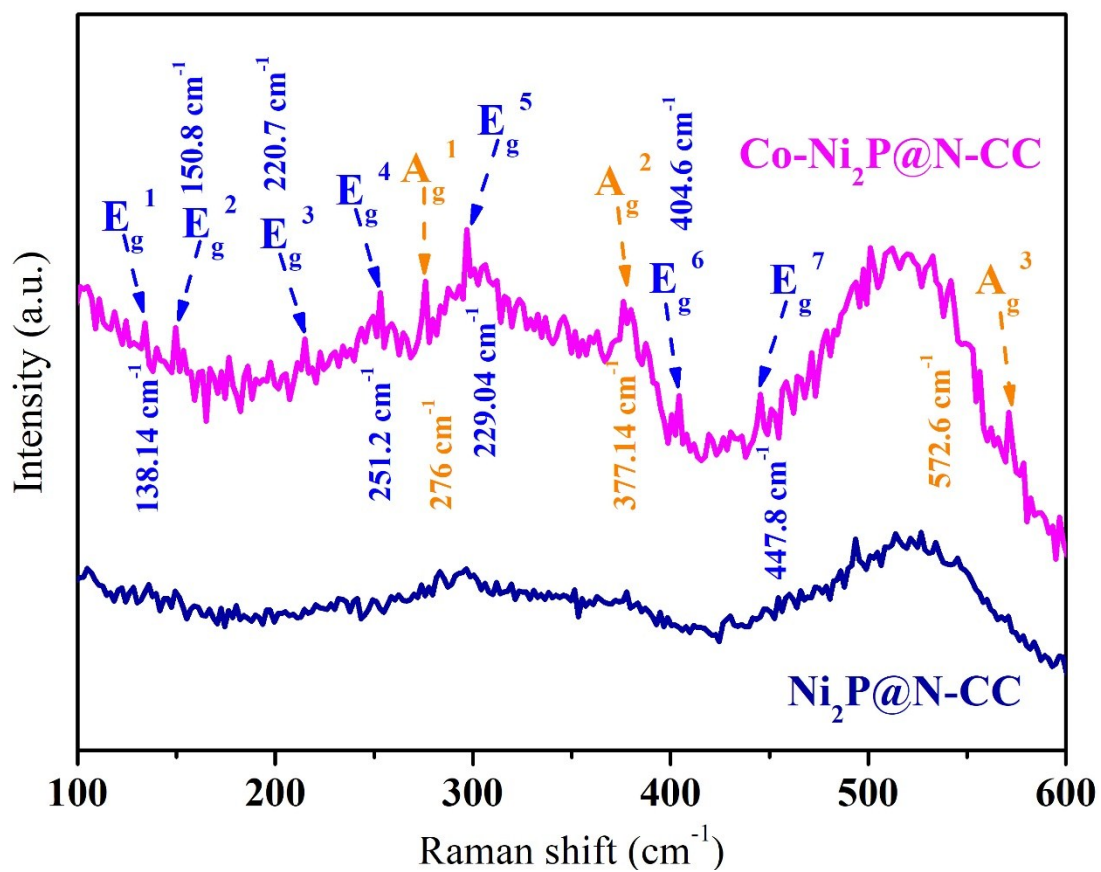

**Figure S3.** Raman spectrums of the as-prepared Co-Ni<sub>2</sub>P@N-CC and Ni<sub>2</sub>P@N-CC.

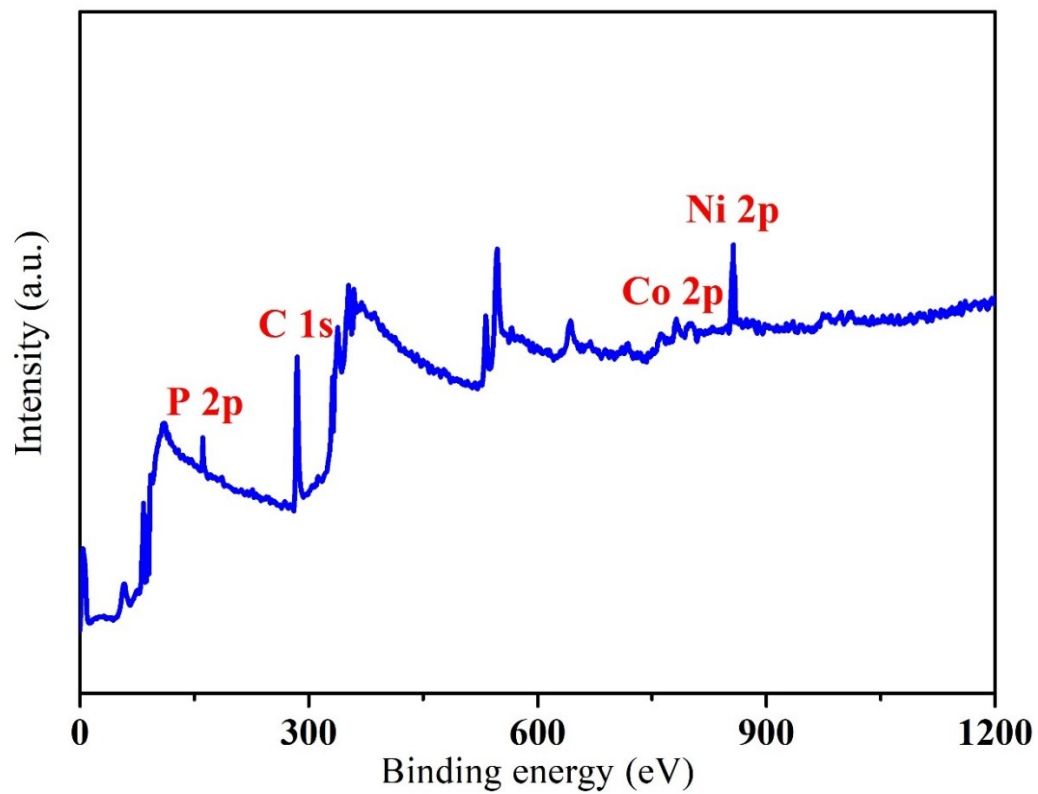

**Figure S4.** XPS survey spectrum of Co-Ni<sub>2</sub>P@N-CC.

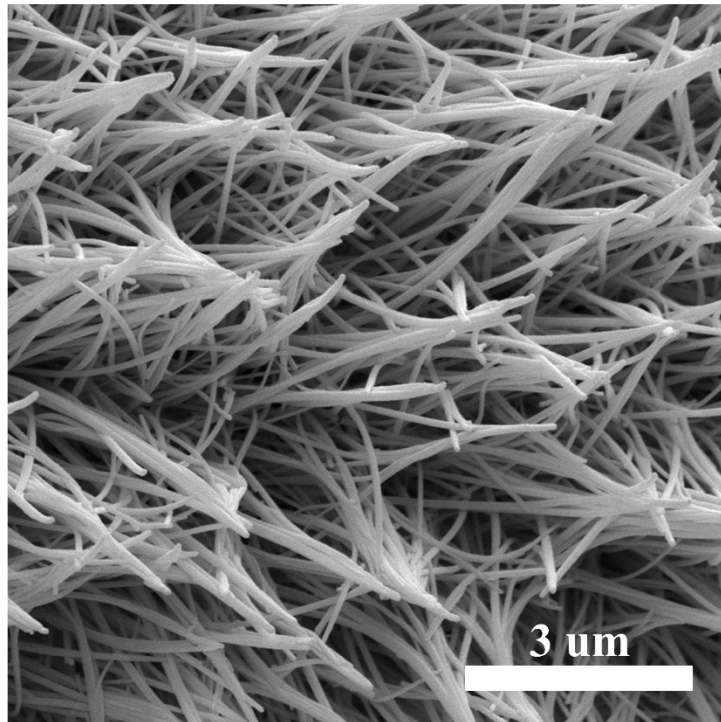

**Figure S5.** FESEM image of Co-Ni<sub>2</sub>P@N-CC.

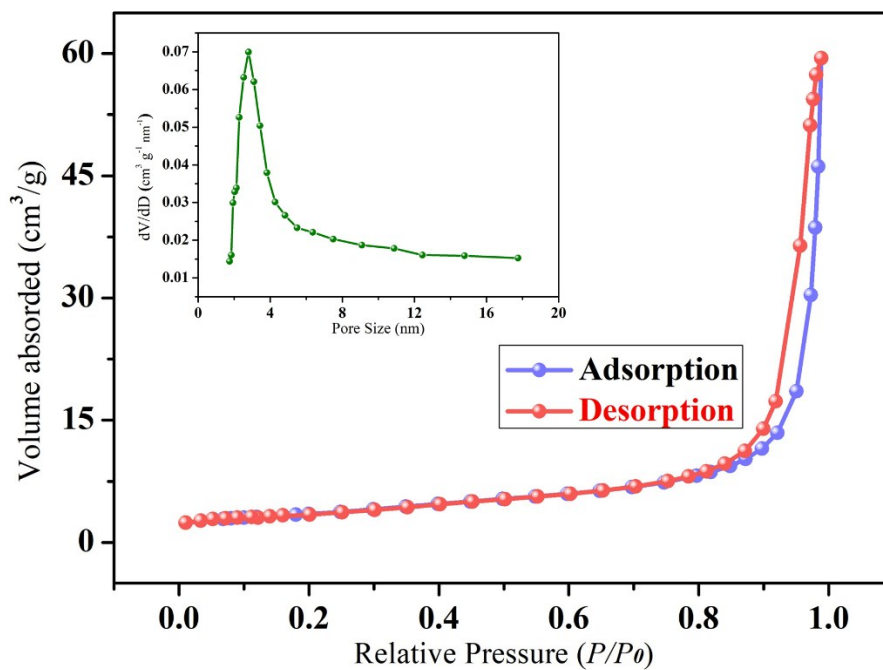

**Figure S6.** N<sub>2</sub> adsorption-desorption isotherms of the Co-Ni<sub>2</sub>P@N-CC and the corresponding pore size distribution (illustration).

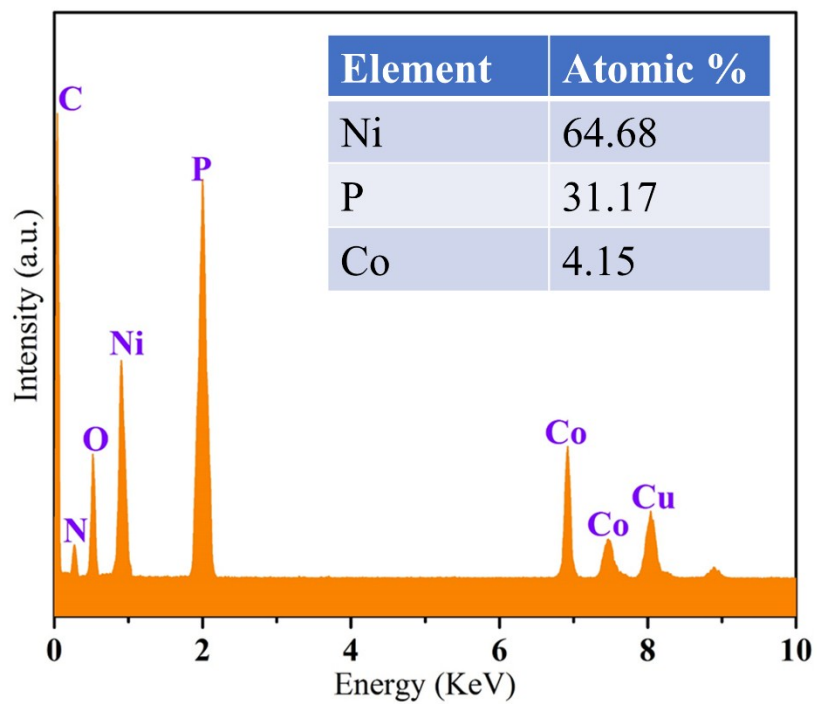

**Figure S7.** TEM-EDX of Co-Ni<sub>2</sub>P@N-CC.



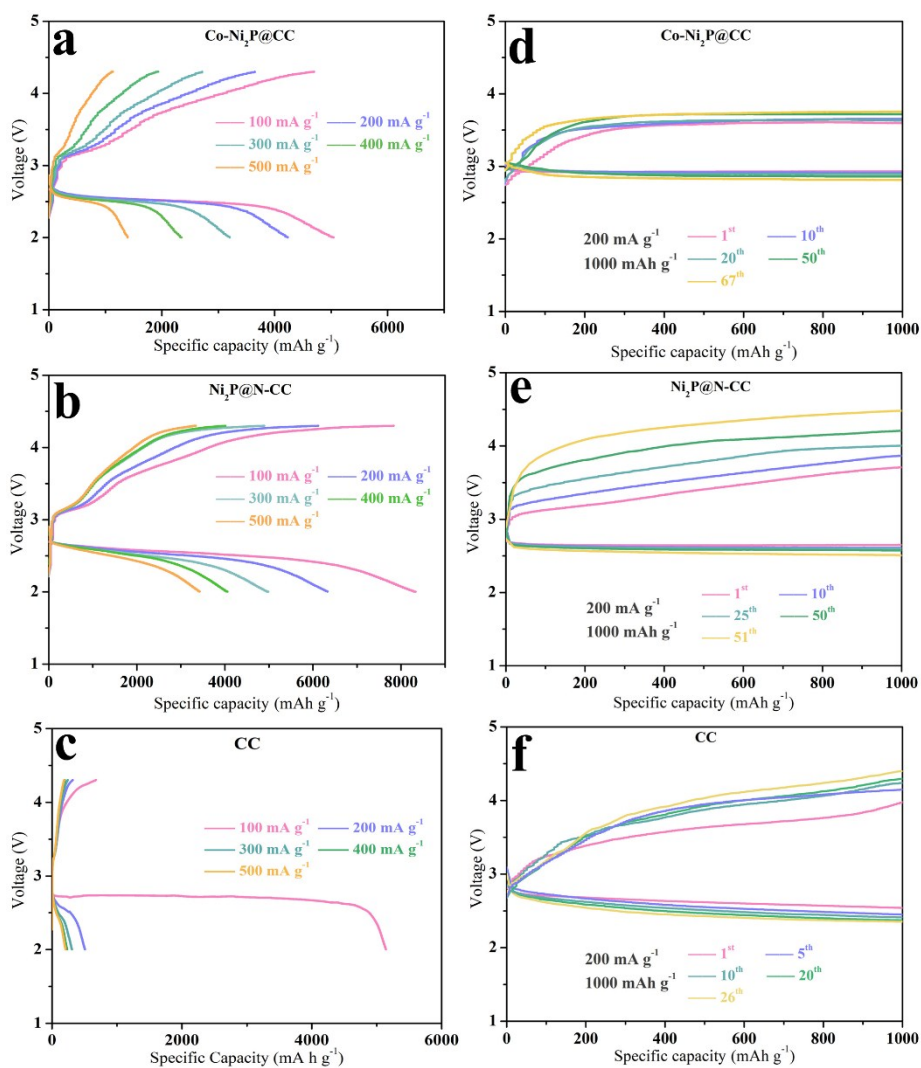

**Figure S8.** the rate performance of Li-O<sub>2</sub> cells based on (a) Co-Ni<sub>2</sub>P@CC, (b) Ni<sub>2</sub>P@N-CC and (c) CC electrodes at various current density; the discharge/charge curves of Li-O<sub>2</sub> batteries with (d) Co-Ni<sub>2</sub>P@CC, (e) Ni<sub>2</sub>P@N-CC and (f) CC electrodes at a current density of 200 mA g<sup>-1</sup> with a restricted capacity of 1000 mA h g<sup>-1</sup>.

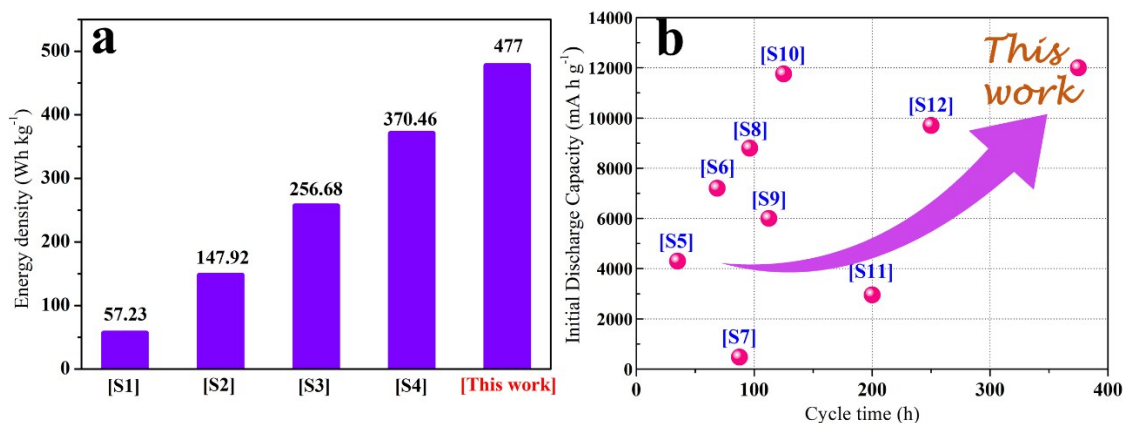

**Figure S9.** (a) comparing energy density of Co-Ni<sub>2</sub>P@N-CC electrode here with that of Li-ion battery, Zn-air battery, Li-S battery, as well as other Li-O<sub>2</sub> systems; (b) performance comparison of pouch-type Li-O<sub>2</sub> battery based on Co-Ni<sub>2</sub>P@N-CC electrode and other flexible batteries.

## Reference

- [S1] R.J. Fu, M. Xiao, S.Y. Choe. *J. Power Sources*. **2013**, 224, 211-224.
- [S2] D.Y. Wang, J. Xiao, W. Xu, J.G. Zhang. *J. Electrochem. Soc.* **2010**, 157, A760-A764.
- [S3] Y.S. Choi, S. K, S.S. Choi, J.S. Han, J.D. Kim, S.E. Jeon, B.H. Jung. *Eletrochim Acta*. **2004**, 50, 833-835.
- [S4] Y.B. He, Z. Chang, S.C. Wu, Y. Qiao, S.Y. Bai, K.Z. Jiang, P. He, H.S. Zhou. *Adv. Energy Mater.* **2018**, 8, 1802130.
- [S5] P. Ribière, S. Grugeon, M. Morcrette, S. Boyanov, S. Laruelle, G. Marlair. *Energy Environ. Sci.* **2012**, 5, 5271-5280.
- [S6] Y.N. Jo, S.H. Kang, K. Prasanna, S.W. Eom, C.W. Lee. *Appl. Surf. Sci.* **2017**, 422, 406-412.
- [S7] Y.N. Jo, K. Prasanna, S.H. Kang, P. Robert, H.S. Kim, S.W. Eom, C.W. Lee. *J.*

*Ind. Eng. Chem.* **2107**, 53, 247-252.

[S8] D. Lee, H. Lee, O. Gwon, O. Kwon, H.Y. Jeong, G. Kim, S.Y. Lee. *J. Mater. Chem. A.* **2019**, DOI: 10.1039/C9TA07681F.

[S9] S. Byun, J. Park, W.A. Appiah, M.H. Ryou, Y.M. Lee. *RSC Adv.* **2017**, 7, 10915-10921.

[S10] H.J. Shin, W.J. Kwark, D. Aurbach, Y.K. Sun. *Adv. Funct. Mater.* **2017**, 27, 160550.

[S11] N.N. Feng, X.W. Mu, X.P. Zhang, P. He, H.S. Zhou. *ACS Appl. Mater. Inter.* **2017**, 9, 3733-3739.

[S12] C.Z. Shu, Y.H. Liu, J.P. Long, X.F. Chen, Y. Su. *Part. & Part. Syst. Char.* **2018**, 35, 1700433.
